# Functional and microstructural brain abnormalities, fatigue, and cognitive dysfunction after mild COVID-19

Lucas Scardua Silva<sup>1,2</sup>, Rafael Batista Joao<sup>1,2</sup>, Mateus Henrique Nogueira<sup>1,2</sup>, Italo Karmann Aventurato<sup>1,2</sup>, Brunno Machado de Campos<sup>1</sup>, Mariana Rabelo de Brito<sup>1,2</sup>, Marina Koutsodontis Machado Alvim<sup>1,2</sup>, Guilherme Vieira Nunes Ludwig<sup>1,3</sup>, Cristiane Rocha<sup>1,4</sup>, Thierry Kaue Alves Silva Souza<sup>1,2</sup>, Beatriz Amorim da Costa<sup>1,2</sup>, Maria Julia Mendes<sup>1,2</sup>, Takeshi Waku<sup>1</sup>, Vinicius de Oliveira Boldrini<sup>5</sup>, Natália Silva Brunetti<sup>5</sup>, Sophia Nora Baptista<sup>5</sup>, Gabriel da Silva Schmitt<sup>2</sup>, Jhulia Gabriela Duarte de Sousa<sup>6</sup>, Tânia Aparecida Marchiori de Oliveira Cardoso<sup>2</sup>, André Schwambach Vieira<sup>4,5</sup>, Leonilda Maria Barbosa Santos<sup>5</sup>, Alessandro dos Santos Farias<sup>5</sup>, Fernando Cendes<sup>1,2</sup>, Clarissa Lin Yasuda<sup>1,2</sup>

1 – Brazilian Institute of Neuroscience and Neurotechnology (BRAINN), University of Campinas

2 - Department of Neurology, Clinics Hospital, University of Campinas

3 - Institute of Mathematics, Statistics and Scientific Computing, University of Campinas

4 – Molecular Genetics Laboratory, Faculty of Medical Sciences, University of Campinas

5 - Autoimmune Research Lab, Institute of Biology, University of Campinas

6 - Department of Radiology, Clinics Hospital, University of Campinas

Abstract: 150 words

Manuscript: 4294 words

Figures: 2

Tables: 1

References: 58

Supplemental material: 4 supplemental figures; 13 tables; 14 references.

Corresponding author:

Clarissa L. Yasuda, MD, PhD

Brazilian Institute of Neuroscience and Neurotechnology (BRAINN)/Neuroimaging Laboratory, Clinics Hospital, University of Campinas

Campinas, Brazil

E-mail: [cyasuda@unicamp.br](mailto:cyasuda@unicamp.br)

Tel: +55 19 35219217

Keywords: COVID-19; neurocovid; SARS-CoV-2; neuroimaging; cognition, fatigue, resting-state

## ABSTRACT

Although post-acute cognitive dysfunction and neuroimaging abnormalities have been reported after hospital discharge in patients recovered from COVID-19, little is known about persistent, long-term alterations in people without hospitalization. We conducted a cross-sectional study of 87 non-hospitalized recovered individuals 54 days after the laboratory confirmation of COVID-19. We performed structured interviews, neurological examination, 3T-MRI scans with diffusion tensor images (DTI) and functional resting-state images (fMRI). Also, we investigated fatigue, anxiety, depression, somnolence, language, memory, and cognitive flexibility, using validated instruments.

Individuals self-reported a high frequency of headache (40%) and memory difficulties (33%). The quantitative analyses confirmed symptoms of fatigue (68%), excessive somnolence (35%), anxiety (29%), impaired cognitive flexibility (40%) and language impairment (33%). There were widespread cerebral white matter alterations (mainly characterized by increased fractional anisotropy), which correlated with abnormal attention and cognitive flexibility. The resting-state fMRI networks analysis showed severely disrupted brain hyperconnectivity and loss of resting-state networks specificity.

## INTRODUCTION

Studies have consistently reported neurological manifestations of COVID-19 (Ellul et al., 2020; Mao et al., 2020). However, little is known about the long-term neurological events associated with the novel coronavirus, severe acute respiratory syndrome coronavirus 2 (SARS-CoV-2). (De Felice, Tovar-Moll, Moll, Munoz, & Ferreira, 2020). While most individuals will recover from respiratory symptoms, the long-term course of post-covid fatigue and cognitive dysfunction is uncertain. One French study identified dysexecutive syndrome in 15/45 (33%) of patients with severe infection (Helms et al., 2020). Another Chinese study recruited 29 patients (after hospitalization) and reported cognitive dysfunction after their recovery (Hetong Zhou et al., 2020). However, there is a limitation of the present understanding of the residual long-term neurological and cognitive dysfunctions (including the nature, duration, and pathophysiology) in individuals who recovered from COVID-19 (Alwan et al., 2020; Callard & Perego, 2020; Ritchie, Chan, & Watermeyer, 2020), especially in those with mild infection who did not require hospitalization.

Although the neuroinvasion of COVID-19 has been demonstrated with the confirmation of the virus's presence in brain autopsies (Puelles et al., 2020), the neural mechanisms underlying both neurological and neuropsychiatric symptoms (acute and chronic) remain unclear. One study with 60 patients (3 months after hospitalization) identified grey and white matter abnormalities with MRI analyses (Lu et al., 2020) but did not include cognitive tests. Given the lack of information about the long-term effects of COVID-19 after mild infection (Garg, Arora, Kumar, & Wig, 2020; Tenforde et al., 2020) we investigated the nature of persistent neurological symptoms in this subgroup of patients (without hospitalization), combining clinical data with cognitive tests, structural and functional MRI analyses.

## METHODS

### Sample and Study design

#### Patients

We conducted a cross-sectional analysis of data from a longitudinal observational study designed to evaluate post-acute neurological alterations (clinical and neuroimaging) related to the COVID-19. We used social media to advertise our study with an online questionnaire (Rayhan et al., 2013) (the questionnaire is presented in the Supplementary Table 13). We successively recruited the first 87 responders (who did not require hospitalization and presented a confirmed diagnosis of COVID-19 (by a polymerase chain reaction [PCR] test or confirmed presence of IgM or IgG antibodies) to visit our center and perform the four steps of the complete protocol: a personal structured interview and neurological examination (performed by certified neurologists), 3T MRI acquisition, neuropsychological testing, and blood sample collection at our University Hospital (University of Campinas, Campinas, Brazil).

#### Neuropsychological evaluation

Due to the uncertainties related to cognitive impairment associated with the new coronavirus, we performed an exploratory neuropsychological evaluation of recovered individuals. We intentionally selected tests to evaluate different cognitive domains (detailed description is presented in the supplementary material), including *language* (Verbal Categorical Fluency Test (S. D. Brucki, et al. , 1997; S. M. Brucki & Rocha, 2004) and Phonemic Verbal Fluency Test (Tombaugh, Kozak, & Rees, 1999)), *episodic memory* (Logical Memory subtest from the Wechsler Memory Scale (WMS-R) (Bolognani et al., 2015; Weschsler, 1987) ) and *cognitive flexibility* (Trail Making Test (TMT) (Campanholo et al., 2014; Strauss E, 2006) with parts A and B).

We calculated z-scores for the results of the neuropsychological tests based on Brazilian standard and scaled scores. We controlled the effects of the age or schooling in a separate analysis using multiple linear regression residuals when normative data covered only one of these variables. For each test, the function was categorized as *preserved* (z-score > -0.66), including average, high average, above average, and exceptionally high scores),

*low average* score (z-score between -0.7 and -1.26); *below-average* score (z-score between -1.32 and -1.82); and *exceptionally low* score (z-score < -1.96) (Beauchamp et al., 2015; Guilmette et al., 2020).

We quantified anxiety symptoms with BAI (Beck Anxiety Inventory), and symptoms of depression with BDI-II (Beck Depression Inventory II); additionally we investigated fatigue with Chalder Fatigue Questionnaire (CFQ-11) (Chalder Fatigue Questionnaire) (Jackson, 2015; Townsend et al., 2020) and excessive daytime sleepiness with ESS (Epworth Sleep Scale) (Walker, Sunderram, Zhang, Lu, & Scharf, 2020). (Details of these tests are described in the supplementary file).

### MRI acquisitions

We acquired all images (patients and controls) in a 3T Philips Achieva scanner using the same protocols: i) structural 3D T1-weighted images with isotropic voxel (1x1x1 mm<sup>3</sup>), acquired in the sagittal plane with 180 slices, TE = 3.2 ms, TR = 7 ms, matrix = 240x240, flip angle = 8 and FOV = 240x240mm<sup>2</sup>) ii) Resting-state: echo planar functional images with isotropic voxel (3x3x3 mm<sup>3</sup>), acquired on the axial plane with 40 slices, no gap, matrix of 80x80, flip angle = 90°, FOV = 240x240mm<sup>2</sup>, TR=2s, TE=30ms and 180 dynamics, resulting in a six minutes scan; iii) DTI was acquired with a single-shot EPI technique (voxel size = 2x2x2 mm<sup>3</sup>, 32 gradient directions, max b-factor = 1000 s/mm<sup>2</sup>, FOV = 256x256 mm<sup>2</sup>)(Garcia et al., 2019; Hatton et al., 2020). Additional details of MRI protocol acquisitions for post-COVID individuals are presented in the supplementary file.

### MRI analysis

#### *DTI analysis*

We used a semi-automated tractography method based on a deterministic approach implemented in ExploreDTI (<http://www.exploredti.com>) and previously described in detail. As an exploratory study, we used tractography to delineate different tracts, including the *commissural tracts* (corpus callosum divided into three parts: Genu, body (BCC) and splenium (SPL)), *association tracts* (inferior longitudinal fasciculus (ILF), inferior fronto-occipital fasciculus IFO and uncinate fasciculus (UNC)), *limbic tracts*, dorsal

cingulum (Dorsal-CING) and parahippocampal cingulum (Parahippocampal-CING)) and one *projection tract* (corticospinal tract (CST)) (Campos et al., 2015; Lebel et al., 2012; Liu, Concha, Lebel, Beaulieu, & Gross, 2012). The values of diffusivities (FA, fractional anisotropy; MD, mean diffusivity; RD, radial diffusivity; AD, axial diffusivity) for each tract of each subject were averaged across all voxels in the entire tract, ensuring that each voxel was counted only once (Lebel et al., 2012; Liu et al., 2012). Only tracts with at least five streamlines were included in the study (Lebel & Beaulieu, 2009). For bilateral tracts, independent right and left values were obtained separately; for the midline tracts (subdivisions of corpus callosum) a single value was calculated for each segment.

### *Functional connectivity*

Given the exploratory nature of this study, we aimed towards a global analysis of functional connectivity and opted to perform a whole-brain study of this group of recovered individuals. Therefore, we did not restrict our analysis to a single or specific resting-state network; instead, we intentionally selected the ROI-to-ROI approach and included the twelve functional resting-state networks (anterior salience, posterior salience, auditory, basal ganglia, dorsal default mode network (DMN), ventral DMN, language, left executive control network (LECN), right executive control network (RECN), sensorimotor, visual and visuospatial) to evaluate how these networks would deviate from the typical pattern observed in healthy volunteers.

We performed the functional connectivity (FC) analysis with the UF<sup>2</sup>C toolbox

(<https://www.lnunicamp.com/uf2c>) within SPM12 (<http://www.fil.ion.ucl.ac.uk/spm/>), using MATLAB 2019b)(Brunno Machado de Campos, Casseb, & Cendes, 2020; B. M. de Campos, Coan, Lin Yasuda, Casseb, & Cendes, 2016). For this analysis, we initially included 217 subjects (134 controls and 83 patients). The preprocessing steps followed the UF<sup>2</sup>C standard pipeline and (briefly) were based on functional image realignment, normalization to the MNI-space (Montreal Neurologic Institute Standard template), co-registration with T1WI image, framewise displacement (FD) estimation, and smoothing with a kernel of 6x6x6 mm (FWHM)(Brunno Machado de Campos et al., 2020). Detailed information about quality control and preprocessing are presented in the Supplementary Material (Functional connectivity section,

Supplementary Figure 2). The final number of subjects included in the analysis was 197 (120 controls and 77 patients, balanced for age ( $p=0.62$ ) and sex ( $p=0.49$ )).

We performed a region of interest (ROI) study, with ROI-to-ROI FC analysis using 70 ROIs from the 12 functional networks (Supplementary table 11). These ROIs are a sub-set of the Shirer et al. 2012 (Shirer, Ryali, Rykhlevskaia, Menon, & Greicius, 2012) atlas available on [https://findlab.stanford.edu/functional\\_ROIs.html](https://findlab.stanford.edu/functional_ROIs.html). The time-series extracted from each ROI followed homogenization procedures, excluding voxels non-functionally representatives, CSF and high probability WM voxels. The individual connectivity matrices were estimated using Pearson's correlation between each possible pairs of ROIs, resulting in a 70x70 matrix for each volunteer. We performed the second-level analysis (group inference) using a two-sample T-test ( $p<0.05$ , FDR corrected) including the connectivity matrices of each group converted to Z-score (Fischer's z-transformation).

### Statistical analyses

Clinical data were analyzed with SPSS 22. We used Chi-square and Fisher's exact test for categorical data. For continuous variables, we used non-parametric Kruskal-Wallis tests (for variables with non-normal distribution) and Student's T-test for those with a normal distribution.

For the analyses of diffusion tensor imaging (DTI) data between patients and controls, we used separated models for each diffusivity (FA, MD, RD and AD (covaried for age)), considering the multivariate analysis of variance (MANOVA) for segments of the corpus callosum and separated, repeated measures ANOVA (RM-ANOVA) for the analyses of bilateral tracts. We applied FDR (Genovese, Lazar, & Nichols, 2002) adjustments with R to adjust for multiple comparisons in each model, (R Core Team, 2020).

Pearson correlations were performed between the neuropsychological data and DTI parameters for specific tracts according to a priori hypothesis for each test, reducing the need to correct for multiple comparisons.

For language, we investigated the correlation between phonological fluency and FA from ILF (Del Tufo, Earle, & Cutting, 2019); for the Trail Making Test, we investigated the association between the scores and the FA of right ILF, as previously investigated in healthy-aging individuals (Perry et al., 2009). However, we were aware of some dissociations of DTI parameters and cognitive impairment (for example, alterations

of mean diffusivity without abnormality of FA (Goldstein et al., 2009)) and therefore explored the correlations between DTI indices (all four measurements) of both parahippocampal cingulae (right and left sides) and episodic memory.

This study was approved by the Research Ethics Committee of the University of Campinas (Certificate of Ethical Appreciation Presentation - CAAE 31556920.0.0000.5404), and all subjects signed a consent form to participate.

## RESULTS

### Clinical characteristics

We evaluated 87 individuals (64 women, median age 36 [range 18-71]), with a median interval (between diagnosis and personal interview) of 54 days (range 16-120 days). During the acute phase, patients reported a median of 4 symptoms (range 0-10, with five asymptomatic individuals), while in the post-acute stage (reported during the structured interview), they informed a median of 2 symptoms (range 0-13, with 25 asymptomatic individuals (28.7%)). The most frequent post-acute symptoms were fatigue (43.7%), headache (40%), memory difficulties (40%), anosmia (31%), and somnolence (18%) (The types and percentages of these symptoms are displayed in Supplementary Figures 3-4). Interestingly, fatigue was reported by 38 individuals (43.7%) and was mostly combined with other symptoms such as headache (25 subjects), memory difficulties (17 subjects) and somnolence (14 subjects).

In terms of post-COVID-19 neurological examination and interview, we identified abnormalities in 11 (12.6%) individuals (described in Supplementary Table 1), although visual inspection of MRI was normal (appropriate for age) for eighty-six (98.9%) individuals. One radiologist (JGDS) visually inspected all the structural MRIs and identified one hemangioma in the temporo-occipital region (the subject confirmed to have it before the infection); we, therefore, excluded this subject from the MRI post-processing studies.

In addition to the structured interview, sixty-five subjects answered the fatigue questionnaire (CFQ-11) with a median of 15 points (range 0-32) and the Epworth sleepiness scale (ESS), with a median of 9 points (range 0-21). Differently from the proportion of symptoms reported during the interview (fatigue in 43.7%, and

somnolence in 18%), the binary classification (presence or absence of symptoms) resulting from the scores showed a higher proportion of symptoms of fatigue in (44/65, 68% of individuals) and excessive daytime sleepiness (23/65, 35%).

The Pearson correlation between CFQ-11 and ESS was moderate ( $r=0.44$ ,  $p<0.001$ ). Besides, excessive daytime sleepiness was more frequent in individuals with fatigue (20/44) than in those without fatigue (3/21),  $p= (0.025)$ .

### Neuropsychological evaluation

We performed the neuropsychological evaluation for a subset of 78 individuals (59 women, with a median age of 36 years (range 18-70)). Nine individuals did not perform the evaluation due to lack of time; no other reasons were reported. Approximately 18% of subjects presented depression symptoms (BDI-II >13), and 29% showed anxiety symptoms (BAI > 10). We identified a correlation between symptoms of depression with the scores of CFQ-11 (BDI-II  $r=0.47$ ,  $p<0.001$ , controlled for BAI scores).

In terms of cognitive performance, we identified abnormal performance (below low and exceptionally low scores) in 33% of phonological fluency, 30% of TMT-A, and 40% of TMT-B tests. (Figure 1, Supplementary Table 2).

Figure1. Neuropsychological evaluation of recovered mild COVID-19 shows cognitive dysfunction mainly in the Train Making Tests and verbal fluency.

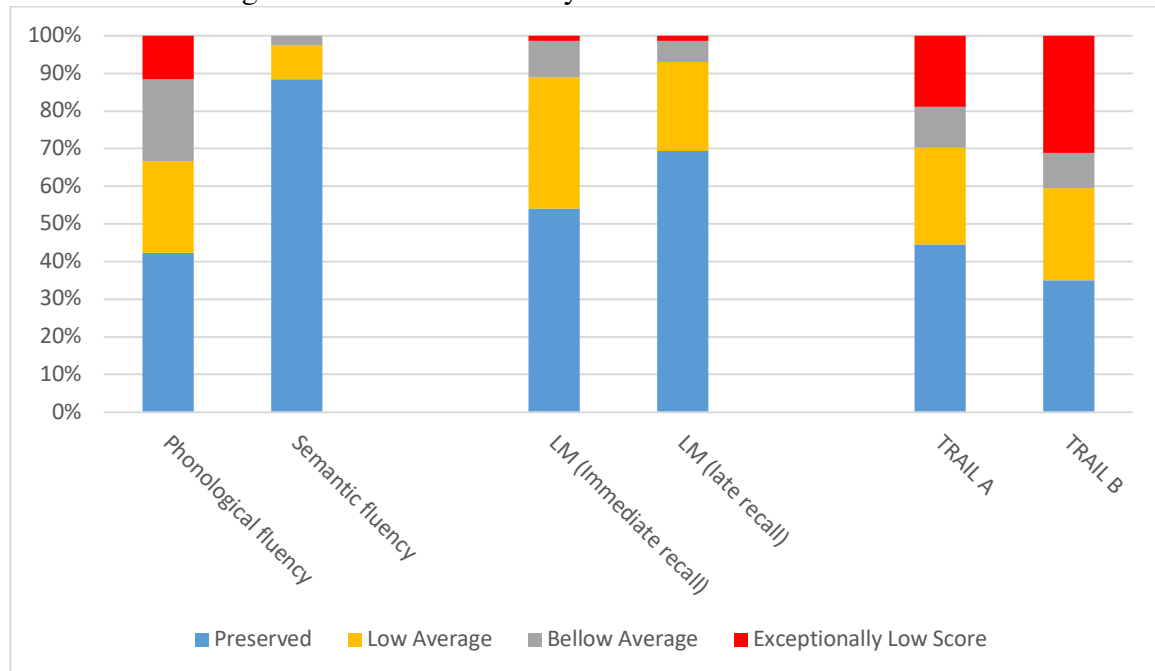

LM: logical memory test

## Neuroimaging findings

### DTI results

We analyzed 86 post-COVID patients and 133 controls paired for age ( $p=0.63$ ) and sex ( $p=0.88$ ). A widespread pattern of alterations was observed in both hemispheres, summarized in Table 1 (full statistical details and results are presented in the Supplementary tables 3-10). We identified elevated FA in most of the bilateral tracts, mainly in the uncinate fasciculi and parahippocampal cinguli.

| Table1. Summary of DTI abnormalities in the post-covid group, compared to controls             |           |           |           |           |
|------------------------------------------------------------------------------------------------|-----------|-----------|-----------|-----------|
|                                                                                                | <b>FA</b> | <b>AD</b> | <b>RD</b> | <b>MD</b> |
| Genu of CC                                                                                     | ↑         | NS        | NS        | NS        |
| Body of CC                                                                                     | NS        | NS        | NS        | NS        |
| Splenium of Corpus Callosum                                                                    | NS        | ↑         | NS        | ↑         |
| Corticospinal tracts                                                                           | ↑         | ↑         | NS        | NS        |
| Dorsal Cinguli                                                                                 | ↑         | ↑         | NS        | NS        |
| Parahippocampal Cinguli                                                                        | ↑         | ↑         | ↑         | ↑         |
| Uncinate fasciculi                                                                             | ↑ ↑       | NS        | ↓         | ↓         |
| Inferior longitudinal fasciculi                                                                | ↑         | NS        | NS        | NS        |
| Inferior occipital fasciculi                                                                   | NS        | NS        | NS        | NS        |
| FA: fractional anisotropy; AD: axial diffusivity; RD: radial diffusivity, MD: mean diffusivity |           |           |           |           |
| CC: corpus callosum; NS: difference from controls was not statistically significant            |           |           |           |           |

### Correlations between DTI parameters and neuropsychological scores

We obtained paired neuropsychological and DTI data from 71 participants. The right ILF-FA was mildly correlated with TRAIL-B ( $r=0.3$ ;  $p=0.015$ ). However, we did not identify correlations between ILF and Phonological fluency, neither between the logical memory scores (immediate and delayed recall) and diffusivities in the parahippocampal cinguli.

### Functional connectivity

We performed 2415 tests  $((70 \times 70) - 70) / 2$  considering all possible ROI to ROIs pairwise combinations. The absolute average connectivity (considering all the 2415 tests) for the control group was 0.2831 (STD = 0.0603) and 0.2985 (STD = 0.0587) for the patient's group, indicating a higher global connectivity for patients. ROI-wisely (after correcting the multiple comparisons with FDR ( $p < 0.05$ )), 208 pairs (connections) presented alterations comparing controls and patients. From this total, 165 represented increased functional connectivity in the patients' group (compared to the controls, Figure 2 A-C), while only nine associated with higher connectivity in the control group (compared to the patients). We also identified an inversion of connectivity direction in 30 pairs: in controls, these pairs were negatively correlated; however, they positively correlated in patients. The tool used for the FC analysis separates inverted connections from the other to improve the understanding of the results. For example, in a situation where the controls presented a connectivity value of -0.4 (naturally anti-correlated ROIs) and the patients showed a value of 0.1, a simple mean comparison would wrongly indicate more robust connectivity for patients, when actually, the disease may have disrupted the natural antagonism between those regions.

In our examination, we separate the intranetwork (connectivity between ROIs within one specific functional network; i.e. ROIs from the DMN) and internetwork connections (connectivity between ROIs of different functional networks; i.e., between ROIs from the DMN and ROIs from the visuospatial network). From the 208 altered connections, eight were classified as intranetwork alterations, and 200 occurred between ROIs of distinct networks. As illustrated in the Figure 2D, eleven networks were compromised, mainly the visuospatial (Dorsal Attention) network (with 94 abnormal connections); additionally, the ROI with the highest number of altered connections was from the same visuospatial network (ROI 64, left superior parietal lobule/supramarginal gyrus/postcentral gyrus/angular gyrus) with 29 atypical connections. Only the auditory network did not present significant alterations (Figure 2D) (detailed alterations for each ROI are presented in the Supplementary Table 12).

Figure 2 displays ROI-to-ROI results (Figure 2 D/E,)

Figure 2. Post-COVID patients present abnormally hyper-connected brain regions in the Functional connectivity study.

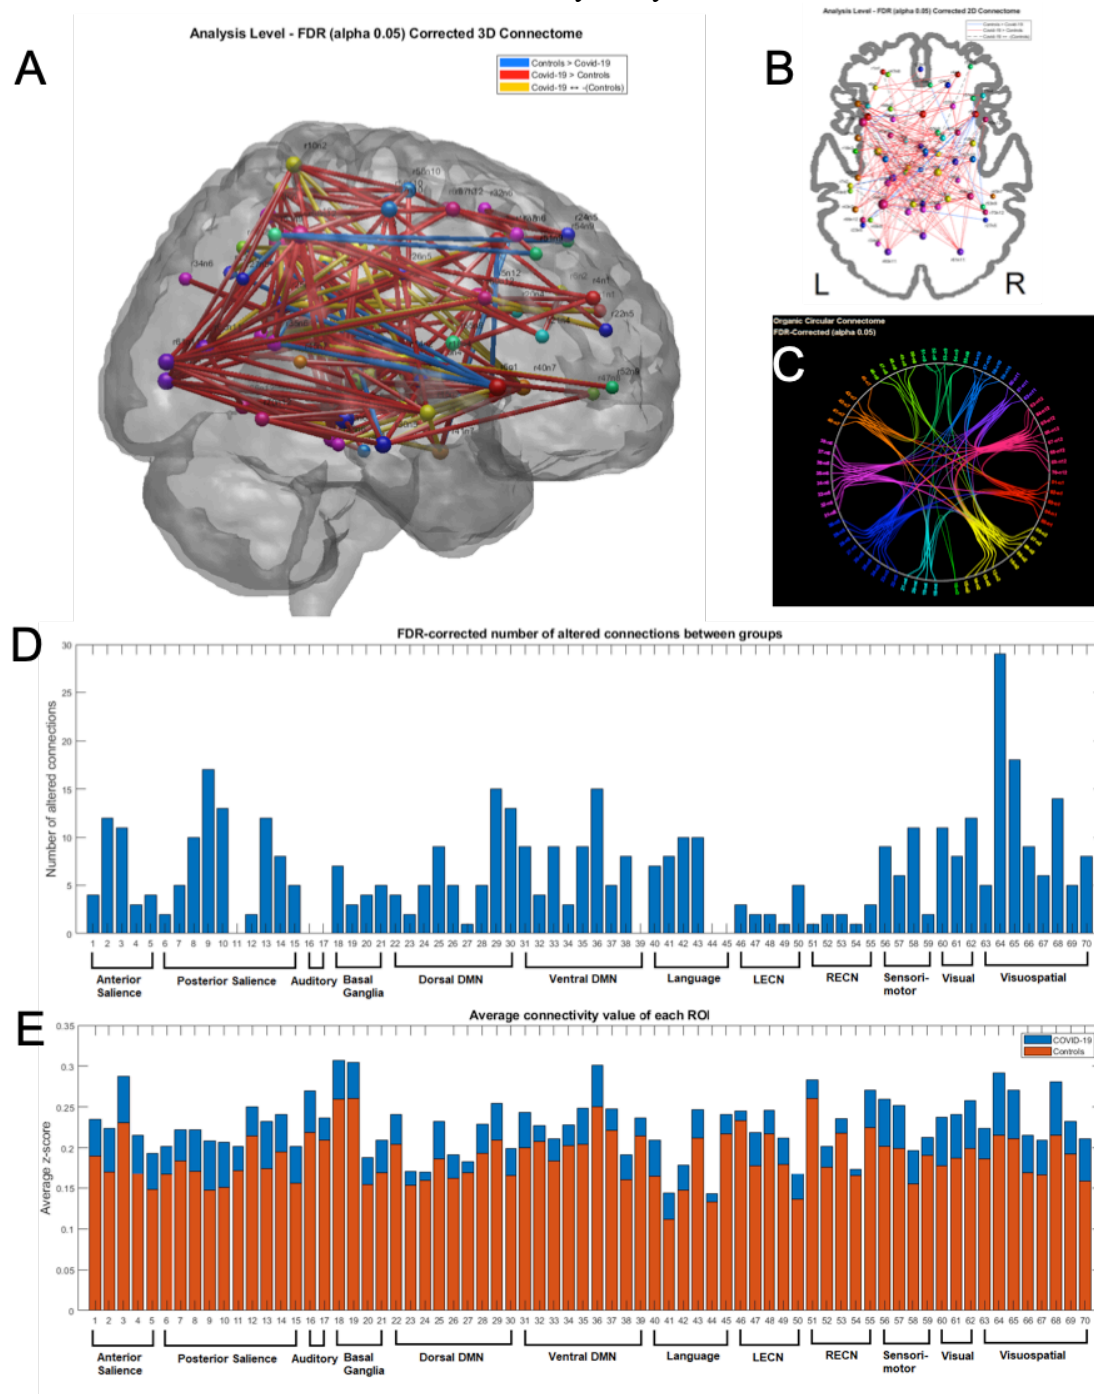

**A/B.** Sagittal (A) and axial (B) views illustrate differences in Functional Connectivity between POST-COVID 19 and healthy controls. **C.** The circular connectome shows hyper-connected brain regions (encoded by colored networks) in POST-COVID 19 group. **D.** Number of abnormal connections per node in patients; only the auditory network does not present increased connectivity. **E.** Average connectivity per node shows increased overall connectivity for all 70 ROIs in post-COVID. The highest differences occurred in the visuospatial network.

## DISCUSSION

We detected persistent headache, fatigue, excessive somnolence, anxiety, and cognitive dysfunction along with structural and functional brain MRI abnormalities two months after the acute COVID-19 infection of non-hospitalized individuals. Cerebral white matter alterations were widespread and correlated with abnormal attention and cognitive flexibility. Brain connectivity was severely disrupted, with excessively and chaotically connected regions associated with significant loss of specificity of eleven (out of twelve investigated) individual standard resting-state networks (anterior and posterior salience, basal ganglia, ventral and dorsal DMN, language, left and right executive control networks, sensorimotor, visual and mostly, the visuospatial network).

### *Persistent Clinical symptoms*

Two months after the acute period, the most frequently reported symptoms were fatigue (43.7%), headache (40%), and memory difficulties (33%), similar to the results from a preprint meta-analysis (Lopez-Leon et al., 2021). Interestingly, the quantitative analysis of the CFQ-11 and ESS revealed a higher proportion of symptomatic individuals (68% with fatigue and 35% with excessive daytime somnolence), compared to the proportions of symptoms reported during the structured interview. While the presence of depression symptoms (18% of subjects, according to the BDI-II scores) was higher than reported (1%), the frequency of anxiety symptoms (29% of subjects) according to the BAI scores was close to those self-reported (23%). These findings are in accordance with one previous study (Townsend et al., 2020), as we observed a similar median score on CFQ-11 (median of 16 points) in our group of non-hospitalized participants. Besides, while we detected a positive correlation between fatigue scores and intensity of depression symptoms (BDI-II scores), they also described the elevated proportion of individuals with fatigue in participants with a history of anxiety/depression.

The proportion of women responders was higher than men, probably due to our method of recruitment nature. There is as yet no clear evidence if sex is a risk factor for developing or perpetuating long-term effects of COVID-19 (Lopez-Leon et al., 2021); however, some studies have demonstrated that post-

infection fatigue seems to be more frequent in women (Townsend et al., 2020; Xiong et al., 2021). As we observed high rates of fatigue in our study group, one possible hypothesis to justify this disproportion is that more affected women were more interested in enrolling than men.

### *Cognitive dysfunction and COVID-19*

Recent studies have confirmed long-term cognitive dysfunction in survivors of COVID-19 (from ICU and ward hospitalization) (Almeria, Cejudo, Sotoca, Deus, & Krupinski, 2020; H. Zhou et al., 2020). However, the cognitive impairment after mild infection (without hospitalization) is not yet well understood. In a recent analysis of 35 post-discharged patients (12.6 years of education and approximately 26 days after discharge), the application of supervised neuropsychological tests revealed abnormal performances mainly in verbal fluency (11.4%), mental flexibility and working memory (8.6%) (Almeria et al., 2020). Our group of 78 non-hospitalized participants presented higher rates of abnormal phonemic fluency (33%) and a high proportion of dysfunction in mental flexibility (Trail Making Test-B test with 40% of impaired performance). Besides the larger number of participants, we examined them approximately 54 days after the acute period. Given the uncertainties related to the new virus, there is the possibility that cognitive dysfunction increases over time. So far, other studies have applied a variety of non-supervised cognitive tests (H. Zhou et al., 2020) (medRxiv preprint doi: <https://doi.org/10.1101/2020.10.20.20215863>) and also demonstrated attention deficits in survivors. Despite the methodological differences, the English study (medRxiv preprint doi: <https://doi.org/10.1101/2020.10.20.20215863>) evaluated a large sample of individuals (although only 361 had confirmed diagnosis of COVID-19) and detected abnormalities in “higher cognitive or executive function”, markedly in tasks with a semantic component, and in those requiring selective visual attention.

It was surprising in our data that a high proportion of subjects (with a median education of 15 years) performed poorly, specifically in the Trail Making Test. It can be partially explained by our convenience sample, which may have attracted more symptomatic participants. Besides, the poor performance on Trail Making Test -B test correlated with abnormalities in the WM structure (reduced FA) of the right inferior longitudinal fasciculus (as previously reported in one study of healthy aging (Perry et al., 2009), which has

been associated with visual processing (Shin et al., 2019). It also correlated with the thinner cortex in the rectus gyrus (submitted data).

## *MRI analyses*

### *DTI alterations*

One recent study of six patients with severe disease (imaged 19 days after admission) identified overall reduced FA values associated with increased MD values (Newcombe et al., 2020), which typically suggest microstructural impairment of white matter (possibly resultant from inflammation and edema). On the contrary (after two months of acute diagnosis), we observed higher FA values in non-hospitalized post-covid subjects, similar to the findings reported by (Lu et al., 2020) that included 60 hospitalized patients evaluated three months after discharge. However, while they (Lu et al., 2020) identified reduced values for MD, RD and AD, we found increased values of these parameters, mostly axial diffusivity (AD). The disparities between these results may be explained by some factors, including the timing of image acquisition, as the different findings may reflect different stages of white matter insult. While the reduced FA values in the acute phase may suggest overall white matter damage, elevated FA values in the post-acute stage may suggest neuroplasticity phenomenon (as observed in neurodegenerative disease (Mole et al., 2016)). Contrary to the original hypothesis of a “mild disease” our results suggest that the new coronavirus may negatively impact the white matter microscopically (as the visual inspection of MRI was normal for all the “mildly infected” participants) in a widespread pattern. Besides, the concomitant identification of neurocognitive impairment in these individuals with elevated FA values indicates that increased Fractional anisotropy may not necessarily signify better function (Alba-Ferrara & de Erausquin, 2013). Identifying structural brain alterations in both mildly and severely affected individuals suggests a more specific effect of the new coronavirus in the white matter than the consequences of sepsis or severe illness. Another intriguing question we intend to analyze with the longitudinal data is the duration of such abnormalities; to this point, we cannot classify these alterations as transient or permanent. Larger groups of patients with longitudinal data are necessary to further understanding the neurological impact of the new coronavirus.

### Functional connectivity analyses

Although visual inspection of structural MRI excluded macrostructural abnormalities in these mildly infected patients, the examination of functional connectivity revealed an intriguing pattern of increased functional connectivity among regions of several resting-state networks. The functional hyperconnectivity of resting-state networks here identified has been portrayed as a paradoxical response to neural injury (Hillary & Grafman, 2017) and previously described in other neurological conditions (Parkinson's disease (Gorges et al., 2015), traumatic brain injury (Hillary et al., 2014), mild cognitive impairment (Gour et al., 2011)). One hypothesis is that such a strong cerebral response attempts to restore the composition of original networks lost due to the neural insult; another possibility is that after the neurological injury, the hyperconnectivity is required to recruit new, alternative pathways to replace the damaged ones (Hillary & Grafman, 2017). Besides, it seems that the hyperconnectivity pattern represents an early stage response for some neurodegenerative processes (Gorges et al., 2015; Hawellek, Hipp, Lewis, Corbetta, & Engel, 2011), and declines over time as the disease advances (Hillary & Grafman, 2017; Olde Dubbelink et al., 2014). The uncertainties related to the abnormal hyperconnectivity in post-infected patients require longitudinal data to confirm (or not) whether the new coronavirus can trigger a neurodegenerative process.

From previous studies, hyperconnectivity in the default mode network has been associated with cognitive impairment (Whitfield-Gabrieli et al., 2009; Yasuda et al., 2013), as well as the deposition of beta-amyloid (Buckner et al., 2005) (116), a marker of Alzheimer disease. Interestingly, individuals with schizophrenia present brain functional hyperconnectivity associated with cognitive impairment in different domains (Krukow, Jonak, Grochowski, Plechawska-Wojcik, & Karakula-Juchnowicz, 2020; Whitfield-Gabrieli et al., 2009). We have previously associated impaired deactivations of the DMN with poor performance on verbal fluency task, in individuals using topiramate (an anti-seizure medication, also used for migraine prophylaxis) (Yasuda et al., 2013). While some studies have demonstrated a negative impact of hyperconnectivity states on cognition, most have focused on the DMN or other networks (Gorges et al., 2015; Whitfield-Gabrieli et al., 2009), and less attention has been directed to the relationship between different resting-state networks. With a different methodological approach (B. M. de Campos et al., 2016),

we explored the relationship between several networks and detected hyperconnectivity among distinct resting-state networks. Unfortunately, we cannot explain the underlying physiopathological mechanisms. Neither can we predict the duration of such states in the post-infected individuals. Given the widespread pattern of alterations, we speculate that these changes may be related to neurological symptoms (such as excessive sleepiness, headache and fatigue) and cognitive dysfunction.

One intriguing finding is the severe impairment of visuospatial network (which included the most impaired ROI in our analysis (ROI 64, left superior parietal lobule/supramarginal gyrus/postcentral gyrus/angular gyrus). As previous studies have confirmed the importance of visuoperceptual abilities (along with working memory and other high-order processes (Sánchez-Cubillo et al., 2009; Varjacic, Mantini, Demeyere, & Gillebert, 2018)) for the performance of Trail Making Test, we raise the hypothesis that the dysfunction of the visuospatial network may be associated with the lower scores produced for both Trail Making Tests (A and B) by our group of individuals with 15 years of education. This idea is supported by the neural correlates of TMT performance (which suggest the involvement of “large-scale networks including prefrontal and parietal structures” (Varjacic et al., 2018)), which coincides with the localization (parietal region) of the most compromised ROI in our FC analysis.

Our longitudinal analyses will allow us not only to comprehend how transient (or permanent) these changes are but will provide more evidence related to possible undesired (and unexpected) consequences of chronic hyperconnectivity in the case of persistent changes of brain dynamics networks.

## LIMITATIONS

This cross-sectional study with a convenience sample restrains the generalization of our findings. However, in facing the limited understanding of the new coronavirus’s neurological impact, we believe our initial observations raise concerns about possible long-term impairment in mildly infected patients. Our longitudinal analyses with a larger sample will answer some of the unsolved questions related to these long-term, persistent symptoms related to mood, cognition and brain connectivity.

## CONCLUSIONS

Our findings suggest the new coronavirus affects the brain in individuals who did not require hospitalization, with persistent fatigue, headache, memory problems and somnolence even after two months of their diagnosis. We detected cognitive impairment in these patients, along with white matter abnormalities and hyperconnectivity among distinct resting-state networks. The degree of brain alterations and the severity of cognitive dysfunction raises the attention for the necessity of extensive longitudinal studies of chronic neuropsychiatric symptoms in post-COVID-19 infected individuals. Specific treatment for symptoms and neurorehabilitation strategies may be necessary to improve the quality of life and cognitive function for those with persistent limitations after the acute phase.

### Competing Financial Interests

The authors declare they have no competing financial interests related to this study.

### Data availability

Data collected and analyzed for this study will be available at the University database. Neuroimaging raw data will be available upon reasonable request.

### Acknowledgements

We thank the team of assistants who worked on the consecutive recruitment of patients: Andrea Ismara de Araújo Ruas, Lilian Cristina dos Santos Capelli and Sonia Neves Romeu Silva. We also are grateful for the work of the Radiology's team.

### Funding

This study was funded by FAPESP-BRAINN (2013/03557-9), FAPESP (2019/11457-8), FAPESP (2019/233160), FAPESP (2020/04032-8); CAPES (Coordination of superior level staff improvement provided scholarship for Dr. Lucas Scárdua Silva).

## References

- Alba-Ferrara, L. M., & de Erausquin, G. A. (2013). What does anisotropy measure? Insights from increased and decreased anisotropy in selective fiber tracts in schizophrenia. *Front Integr Neurosci*, 7, 9. doi:10.3389/fnint.2013.00009
- Almeria, M., Cejudo, J. C., Sotoca, J., Deus, J., & Krupinski, J. (2020). Cognitive profile following COVID-19 infection: Clinical predictors leading to neuropsychological impairment. *Brain Behav Immun Health*, 9, 100163. doi:10.1016/j.bbih.2020.100163
- Alwan, N. A., Attree, E., Blair, J. M., Bogaert, D., Bowen, M. A., Boyle, J., . . . Woods, V. (2020). From doctors as patients: a manifesto for tackling persisting symptoms of covid-19. *BMJ*, 370, m3565. doi:10.1136/bmj.m3565
- Beauchamp, M. H., Brooks, B. L., Barrowman, N., Aglipay, M., Keightley, M., Anderson, P., . . . Zemek, R. (2015). Empirical Derivation and Validation of a Clinical Case Definition for Neuropsychological Impairment in Children and Adolescents. *J Int Neuropsychol Soc*, 21(8), 596-609. doi:10.1017/S1355617715000636
- Bolognani, S. A. P., Miranda, M. C., Martins, M., Rzezak, P., Bueno, O. F. A., de Camargo, C. H. P., & Pompeia, S. (2015). Development of alternative versions of the Logical Memory subtest of the WMS-R for use in Brazil. *Dement Neuropsychol*, 9(2), 136-148. doi:10.1590/1980-57642015dn92000008
- Brucki, S. D., et al. . (1997). Dados normativos para o teste de Fluência Verbal categoria animais em nosso meio. *Arq neuropsiquiatria*, 55(1), 56-61.
- Brucki, S. M., & Rocha, M. S. (2004). Category fluency test: effects of age, gender and education on total scores, clustering and switching in Brazilian Portuguese-speaking subjects. *Braz J Med Biol Res*, 37(12), 1771-1777. doi:10.1590/s0100-879x2004001200002
- Buckner, R. L., Snyder, A. Z., Shannon, B. J., LaRossa, G., Sachs, R., Fotenos, A. F., . . . Mintun, M. A. (2005). Molecular, structural, and functional characterization of Alzheimer's disease: evidence for a relationship between default activity, amyloid, and memory. *J Neurosci*, 25(34), 7709-7717. doi:10.1523/jneurosci.2177-05.2005
- Callard, F., & Perego, E. (2020). How and why patients made Long Covid. *Soc Sci Med*, 113426. doi:10.1016/j.socscimed.2020.113426
- Campanholo, K. R., Romão, M. A., Machado, M. A. R., Serrao, V. T., Coutinho, D. G. C., Benute, G. R. G., . . . de Lucia, M. C. S. (2014). Performance of an adult Brazilian sample on the Trail Making Test and Stroop Test. *Dement Neuropsychol*, 8(1), 26-31. doi:10.1590/s1980-57642014dn81000005
- Campos, B. M., Coan, A. C., Beltramini, G. C., Liu, M., Yassuda, C. L., Ghizoni, E., . . . Cendes, F. (2015). White matter abnormalities associate with type and localization of focal epileptogenic lesions. *Epilepsia*, 56(1), 125-132. doi:10.1111/epi.12871
- de Campos, B. M., Casseb, R. F., & Cendes, F. (2020). UF2C — User-Friendly Functional Connectivity: A neuroimaging toolbox for fMRI processing and analyses. *SoftwareX*, 11. doi:10.1016/j.softx.2020.100434
- de Campos, B. M., Coan, A. C., Lin Yasuda, C., Casseb, R. F., & Cendes, F. (2016). Large-scale brain networks are distinctly affected in right and left mesial temporal lobe epilepsy. *Hum Brain Mapp*, 37(9), 3137-3152. doi:10.1002/hbm.23231
- De Felice, F. G., Tovar-Moll, F., Moll, J., Munoz, D. P., & Ferreira, S. T. (2020). Severe Acute Respiratory Syndrome Coronavirus 2 (SARS-CoV-2) and the Central Nervous System. *Trends Neurosci*. doi:10.1016/j.tins.2020.04.004
- Del Tufo, S. N., Earle, F. S., & Cutting, L. E. (2019). The impact of expressive language development and the left inferior longitudinal fasciculus on listening and reading comprehension. *J Neurodev Disord*, 11(1), 37. doi:10.1186/s11689-019-9296-7
- Ellul, M. A., Benjamin, L., Singh, B., Lant, S., Michael, B. D., Easton, A., . . . Solomon, T. (2020). Neurological associations of COVID-19. *Lancet Neurol*. doi:10.1016/S1474-4422(20)30221-0

- Garcia, D. D. S., Polydoro, M. S., Alvim, M. K. M., Ishikawa, A., Moreira, J. C. V., Nogueira, M. H., . . . Yasuda, C. L. (2019). Anxiety and depression symptoms disrupt resting state connectivity in patients with genetic generalized epilepsies. *Epilepsia*, 60(4), 679-688. doi:10.1111/epi.14687
- Garg, P., Arora, U., Kumar, A., & Wig, N. (2020). The "post-COVID" syndrome: How deep is the damage? *J Med Virol*. doi:10.1002/jmv.26465
- Genovese, C. R., Lazar, N. A., & Nichols, T. (2002). Thresholding of statistical maps in functional neuroimaging using the false discovery rate. *Neuroimage*, 15(4), 870-878. doi:10.1006/nimg.2001.1037
- Goldstein, F. C., Mao, H., Wang, L., Ni, C., Lah, J. J., & Levey, A. I. (2009). White Matter Integrity and Episodic Memory Performance in Mild Cognitive Impairment: A Diffusion Tensor Imaging Study. *Brain Imaging Behav*, 3(2), 132-141. doi:10.1007/s11682-008-9055-y
- Gorges, M., Müller, H. P., Lulé, D., Pinkhardt, E. H., Ludolph, A. C., & Kassubek, J. (2015). To rise and to fall: functional connectivity in cognitively normal and cognitively impaired patients with Parkinson's disease. *Neurobiol Aging*, 36(4), 1727-1735. doi:10.1016/j.neurobiolaging.2014.12.026
- Gour, N., Ranjeva, J. P., Ceccaldi, M., Confort-Gouny, S., Barbeau, E., Soulier, E., . . . Felician, O. (2011). Basal functional connectivity within the anterior temporal network is associated with performance on declarative memory tasks. *Neuroimage*, 58(2), 687-697. doi:10.1016/j.neuroimage.2011.05.090
- Guilmette, T. J., Sweet, J. J., Hebben, N., Koltai, D., Mahone, E. M., Spiegler, B. J., . . . Conference, P. (2020). American Academy of Clinical Neuropsychology consensus conference statement on uniform labeling of performance test scores. *Clin Neuropsychol*, 34(3), 437-453. doi:10.1080/13854046.2020.1722244
- Hatton, S. N., Huynh, K. H., Bonilha, L., Abela, E., Alhusaini, S., Altmann, A., . . . McDonald, C. R. (2020). White matter abnormalities across different epilepsy syndromes in adults: an ENIGMA-Epilepsy study. *Brain*, 143(8), 2454-2473. doi:10.1093/brain/awaa200
- Hawellek, D. J., Hipp, J. F., Lewis, C. M., Corbetta, M., & Engel, A. K. (2011). Increased functional connectivity indicates the severity of cognitive impairment in multiple sclerosis. *Proc Natl Acad Sci U S A*, 108(47), 19066-19071. doi:10.1073/pnas.1110024108
- Helms, J., Kremer, S., Merdji, H., Clere-Jehl, R., Schenck, M., Kummerlen, C., . . . Meziani, F. (2020). Neurologic Features in Severe SARS-CoV-2 Infection. *N Engl J Med*. doi:10.1056/NEJMc2008597
- Hillary, F. G., & Grafman, J. H. (2017). Injured Brains and Adaptive Networks: The Benefits and Costs of Hyperconnectivity. *Trends Cogn Sci*, 21(5), 385-401. doi:10.1016/j.tics.2017.03.003
- Hillary, F. G., Rajtmajer, S. M., Roman, C. A., Medaglia, J. D., Slocomb-Dluzen, J. E., Calhoun, V. D., . . . Wylie, G. R. (2014). The rich get richer: brain injury elicits hyperconnectivity in core subnetworks. *PLoS One*, 9(8), e104021. doi:10.1371/journal.pone.0104021
- Jackson, C. (2015). The Chalder Fatigue Scale (CFQ 11). *Occup Med (Lond)*, 65(1), 86. doi:10.1093/occmed/kqu168
- Krukow, P., Jonak, K., Grochowski, C., Plechawska-Wojcik, M., & Karakula-Juchnowicz, H. (2020). Resting-state hyperconnectivity within the default mode network impedes the ability to initiate cognitive performance in first-episode schizophrenia patients. *Prog Neuropsychopharmacol Biol Psychiatry*, 102, 109959. doi:10.1016/j.pnpbp.2020.109959
- Lebel, C., & Beaulieu, C. (2009). Lateralization of the arcuate fasciculus from childhood to adulthood and its relation to cognitive abilities in children. *Hum Brain Mapp*, 30(11), 3563-3573. doi:10.1002/hbm.20779
- Lebel, C., Gee, M., Camicioli, R., Wieler, M., Martin, W., & Beaulieu, C. (2012). Diffusion tensor imaging of white matter tract evolution over the lifespan. *Neuroimage*, 60(1), 340-352. doi:10.1016/j.neuroimage.2011.11.094
- Liu, M., Concha, L., Lebel, C., Beaulieu, C., & Gross, D. W. (2012). Mesial temporal sclerosis is linked with more widespread white matter changes in temporal lobe epilepsy. *Neuroimage Clin*, 1(1), 99-105. doi:10.1016/j.nicl.2012.09.010
- Lopez-Leon, S., Wegman-Ostrosky, T., Perelman, C., Sepulveda, R., Rebolledo, P. A., Cuapio, A., & Villapol, S. (2021). More than 50 Long-term effects of COVID-19: a systematic review and meta-analysis. *medRxiv*. doi:10.1101/2021.01.27.21250617

- Lu, Y., Li, X., Geng, D., Mei, N., Wu, P. Y., Huang, C. C., . . . Yin, B. (2020). Cerebral Micro-Structural Changes in COVID-19 Patients - An MRI-based 3-month Follow-up Study. *EClinicalMedicine*, 100484. doi:10.1016/j.eclinm.2020.100484
- Mao, L., Jin, H., Wang, M., Hu, Y., Chen, S., He, Q., . . . Hu, B. (2020). Neurologic Manifestations of Hospitalized Patients With Coronavirus Disease 2019 in Wuhan, China. *JAMA Neurol*. doi:10.1001/jamaneurol.2020.1127
- Mole, J. P., Subramanian, L., Bracht, T., Morris, H., Metzler-Baddeley, C., & Linden, D. E. (2016). Increased fractional anisotropy in the motor tracts of Parkinson's disease suggests compensatory neuroplasticity or selective neurodegeneration. *Eur Radiol*, 26(10), 3327-3335. doi:10.1007/s00330-015-4178-1
- Newcombe, V. F. J., Spindler, L. R. B., Das, T., Winzeck, S., Allinson, K., Stamatakis, E. A., . . . Cambridge NeuroCovid Imaging, C. (2020). Neuroanatomical substrates of generalized brain dysfunction in COVID-19. *Intensive Care Med*. doi:10.1007/s00134-020-06241-w
- Olde Dubbelink, K. T., Schoonheim, M. M., Deijen, J. B., Twisk, J. W., Barkhof, F., & Berendse, H. W. (2014). Functional connectivity and cognitive decline over 3 years in Parkinson disease. *Neurology*, 83(22), 2046-2053. doi:10.1212/wnl.0000000000001020
- Perry, M. E., McDonald, C. R., Hagler, D. J., Jr., Gharapetian, L., Kuperman, J. M., Koyama, A. K., . . . McEvoy, L. K. (2009). White matter tracts associated with set-shifting in healthy aging. *Neuropsychologia*, 47(13), 2835-2842. doi:10.1016/j.neuropsychologia.2009.06.008
- Puelles, V. G., Lutgehetmann, M., Lindenmeyer, M. T., Sperhake, J. P., Wong, M. N., Allweiss, L., . . . Huber, T. B. (2020). Multiorgan and Renal Tropism of SARS-CoV-2. *N Engl J Med*. doi:10.1056/NEJMc2011400
- R Core Team. (2020). R: A language and environment for statistical computing. Wien: R Foundation for Statistical Computing. Retrieved from <https://www.R-project.org/>
- Ritchie, K., Chan, D., & Watermeyer, T. (2020). The cognitive consequences of the COVID-19 epidemic: collateral damage? *Brain Communications*, 2(2). doi:10.1093/braincomms/fcaa069
- Sánchez-Cubillo, I., Periañez, J. A., Adrover-Roig, D., Rodríguez-Sánchez, J. M., Ríos-Lago, M., Tirapu, J., & Barceló, F. (2009). Construct validity of the Trail Making Test: role of task-switching, working memory, inhibition/interference control, and visuomotor abilities. *J Int Neuropsychol Soc*, 15(3), 438-450. doi:10.1017/s1355617709090626
- Shin, J., Rowley, J., Chowdhury, R., Jolicoeur, P., Klein, D., Grova, C., . . . Kobayashi, E. (2019). Inferior Longitudinal Fasciculus' Role in Visual Processing and Language Comprehension: A Combined MEG-DTI Study. *Front Neurosci*, 13, 875. doi:10.3389/fnins.2019.00875
- Shirer, W. R., Ryali, S., Rykhlevskaia, E., Menon, V., & Greicius, M. D. (2012). Decoding subject-driven cognitive states with whole-brain connectivity patterns. *Cereb Cortex*, 22(1), 158-165. doi:10.1093/cercor/bhr099
- Strauss E, S. E., Spreen O. (2006). *A compendium of neuropsychological tests. Administration, norms and commentary*. New York: Oxford University Press.
- Tenforde, M. W., Kim, S. S., Lindsell, C. J., Billig Rose, E., Shapiro, N. I., Files, D. C., . . . Feldstein, L. R. (2020). Symptom Duration and Risk Factors for Delayed Return to Usual Health Among Outpatients with COVID-19 in a Multistate Health Care Systems Network - United States, March-June 2020. *MMWR Morb Mortal Wkly Rep*, 69(30), 993-998. doi:10.15585/mmwr.mm6930e1
- Tombaugh, T. N., Kozak, J., & Rees, L. (1999). Normative data stratified by age and education for two measures of verbal fluency: FAS and animal naming. *Arch Clin Neuropsychol*, 14(2), 167-177.
- Townsend, L., Dyer, A. H., Jones, K., Dunne, J., Mooney, A., Gaffney, F., . . . Conlon, N. (2020). Persistent fatigue following SARS-CoV-2 infection is common and independent of severity of initial infection. *PLoS One*, 15(11), e0240784. doi:10.1371/journal.pone.0240784
- Varjadic, A., Mantini, D., Demeyere, N., & Gillebert, C. R. (2018). Neural signatures of Trail Making Test performance: Evidence from lesion-mapping and neuroimaging studies. *Neuropsychologia*, 115, 78-87. doi:10.1016/j.neuropsychologia.2018.03.031
- Walker, N. A., Sunderram, J., Zhang, P., Lu, S. E., & Scharf, M. T. (2020). Clinical utility of the Epworth sleepiness scale. *Sleep Breath*. doi:10.1007/s11325-020-02015-2

- Weschler, D. (1987). *Manual for the Wechsler Memory Scale - Revised*. San Antonio: TX: The Psychological Corporation.
- Whitfield-Gabrieli, S., Thermenos, H. W., Milanovic, S., Tsuang, M. T., Faraone, S. V., McCarley, R. W., . . . Seidman, L. J. (2009). Hyperactivity and hyperconnectivity of the default network in schizophrenia and in first-degree relatives of persons with schizophrenia. *Proc Natl Acad Sci U S A*, *106*(4), 1279-1284. doi:10.1073/pnas.0809141106
- Xiong, Q., Xu, M., Li, J., Liu, Y., Zhang, J., Xu, Y., & Dong, W. (2021). Clinical sequelae of COVID-19 survivors in Wuhan, China: a single-centre longitudinal study. *Clinical Microbiology and Infection*, *27*(1), 89-95. doi:<https://doi.org/10.1016/j.cmi.2020.09.023>
- Yasuda, C. L., Centeno, M., Vollmar, C., Stretton, J., Symms, M., Cendes, F., . . . Koepp, M. J. (2013). The effect of topiramate on cognitive fMRI. *Epilepsy Res*, *105*(1-2), 250-255. doi:10.1016/j.epilepsyres.2012.12.007
- Zhou, H., Lu, S., Chen, J., Wei, N., Wang, D., Lyu, H., . . . Hu, S. (2020). The landscape of cognitive function in recovered COVID-19 patients. *J Psychiatr Res*, *129*, 98-102. doi:10.1016/j.jpsychires.2020.06.022
- Zhou, H., Lu, S., Chen, J., Wei, N., Wang, D., Lyu, H., . . . Hu, S. (2020). The landscape of cognitive function in recovered COVID-19 patients. *J Psychiatr Res*, *129*, 98-102. doi:10.1016/j.jpsychires.2020.06.022
